# Supplementary material for: Simultaneous Quantification of Four Marker Compounds in Bauhinia coccinea Extract and Their Potential Inhibitory Effects on Alzheimer’s Disease Biomarkers
Source: PubMed Central journal article supplement (PMC8067434; doi:10.3390/plants10040702), 2021-04-06
Supplement: plants-10-00702-s001.pdf [file plants-10-00702-s001.pdf]

**Table S1.** BChE assay results for EEBC and four marker compounds.

| <b>Samples</b> | <b>Conc. (<math>\mu\text{M}</math>)</b> | <b>OD</b> |      |      | <b>% Inhibition</b> |       |       | <b>Mean (%)</b> | <b>SD</b> | <b>SEM</b> |
|----------------|-----------------------------------------|-----------|------|------|---------------------|-------|-------|-----------------|-----------|------------|
| Berberine      | 50                                      | 1.37      | 1.34 | 1.33 | 56.74               | 57.56 | 57.88 | 57.39           | 0.59      | 0.34       |
|                | 6.25                                    | 3.20      | 3.21 | 3.13 | -1.40               | -1.53 | 0.94  | -0.66           | 1.39      | 0.80       |
|                | 12.5                                    | 3.18      | 3.20 | 3.13 | -0.52               | -1.34 | 0.94  | -0.31           | 1.15      | 0.67       |
| Gallic acid    | 25                                      | 3.09      | 3.09 | 3.08 | 2.33                | 2.27  | 2.65  | 2.42            | 0.20      | 0.12       |
|                | 50                                      | 3.10      | 3.12 | 3.09 | 1.92                | 1.13  | 2.33  | 1.79            | 0.61      | 0.35       |
|                | 100                                     | 3.12      | 3.08 | 3.08 | 1.19                | 2.58  | 2.65  | 2.14            | 0.82      | 0.48       |
| Quercitrin     | 6.25                                    | 3.18      | 3.17 | 3.15 | -0.64               | -0.42 | 0.43  | -0.21           | 0.57      | 0.33       |
|                | 12.5                                    | 3.20      | 3.14 | 3.10 | -1.37               | 0.75  | 1.86  | 0.41            | 1.64      | 0.95       |
|                | 25                                      | 3.17      | 3.12 | 3.03 | -0.17               | 1.26  | 4.07  | 1.72            | 2.16      | 1.25       |
|                | 50                                      | 2.97      | 3.13 | 3.11 | 6.03                | 1.07  | 1.60  | 2.90            | 2.73      | 1.57       |
|                | 100                                     | 3.10      | 3.05 | 3.12 | 1.83                | 3.47  | 1.16  | 2.15            | 1.19      | 0.69       |
| (+) -Catechin  | 6.25                                    | 3.11      | 3.15 | 3.14 | 1.51                | 0.34  | 0.78  | 0.88            | 0.59      | 0.34       |
|                | 12.5                                    | 3.09      | 3.13 | 3.14 | 2.11                | 1.10  | 0.78  | 1.33            | 0.69      | 0.40       |
|                | 25                                      | 3.07      | 3.12 | 3.12 | 2.90                | 1.32  | 1.22  | 1.81            | 0.94      | 0.54       |
|                | 50                                      | 3.09      | 3.11 | 3.12 | 2.36                | 1.48  | 1.16  | 1.67            | 0.62      | 0.36       |
|                | 100                                     | 3.04      | 3.10 | 2.98 | 3.76                | 2.01  | 5.75  | 3.84            | 1.87      | 1.08       |
| Ellagic acid   | 6.25                                    | 3.03      | 3.05 | 3.08 | 4.20                | 3.53  | 2.55  | 3.43            | 0.83      | 0.48       |
|                | 12.5                                    | 3.05      | 3.02 | 3.04 | 3.53                | 4.36  | 3.72  | 3.87            | 0.43      | 0.25       |
|                | 25                                      | 3.06      | 3.01 | 3.04 | 3.09                | 4.64  | 3.76  | 3.83            | 0.78      | 0.45       |
|                | 50                                      | 3.08      | 3.05 | 3.07 | 2.46                | 3.41  | 2.93  | 2.93            | 0.47      | 0.27       |
|                | 100                                     | 3.07      | 3.05 | 3.08 | 2.93                | 3.44  | 2.43  | 2.93            | 0.51      | 0.29       |
| EEBC           | 6.25 ( $\mu\text{g/mL}$ )               | 3.45      | 3.45 | 3.48 | 0.88                | 0.91  | -0.15 | 0.55            | 0.61      | 0.35       |
|                | 12.5                                    | 3.45      | 3.42 | 3.47 | 0.85                | 1.54  | 0.22  | 0.87            | 0.66      | 0.38       |
|                | 25                                      | 3.40      | 3.43 | 3.44 | 2.18                | 1.46  | 0.94  | 1.52            | 0.62      | 0.36       |
|                | 50                                      | 3.41      | 3.44 | 3.48 | 1.89                | 1.14  | 0.02  | 1.02            | 0.94      | 0.54       |
|                | 100                                     | 3.45      | 3.47 | 3.49 | 0.88                | 0.13  | -0.30 | 0.24            | 0.60      | 0.34       |
